# Supplementary material for: Estivation-responsive microRNAs in a hypometabolic terrestrial snail
Source: PeerJ. 2019 Feb 20;7:e6515. doi: 10.7717/peerj.6515 (PMC6387573; doi:10.7717/peerj.6515)
Supplement: Table S1 — Primers used for miRNA analysis of O. lactea foot muscle including miRNA-specific forward primers, universal reverse primer, reference gene primers, and stem-loop adapter used for reverse-transcription. [file peerj-07-6515-s001.xlsx]

## Sheet: Sheet1
	Target	Primer Sequence (5’-3’)
	ola-bantam-3p	ACA CTC CAG CTG GGT GAG ATC ATT GTG AA
	ola-let-7-5p	ACA CTC CAG CTG GGT GAG GTA GTA GGT TG
	ola-miR-1-3p	ACA CTC CAG CTG GGT GGA ATG TAA AGA AG
	ola-miR-2a-3p	ACA CTC CAG CTG GGT ATC ACA GCC AGC TTT G
	ola-miR-2c-3p	ACA CTC CAG CTG GGT ATC ACA GCC AGC TT
	ola-miR-7-5p	ACA CTC CAG CTG GGT GGA AGA CTA GTG AT
	ola-miR-8-3p	ACA CTC CAG CTG GGT AAT ACT GTC AGG TA
	ola-miR-9-5p	ACA CTC CAG CTG GGT CTT TGG TTA TCT AG
	ola-miR-12-5p	ACA CTC CAG CTG GGT GAG TAT TAC TTC AG
	ola-miR-29-3p	ACA CTC CAG CTG GGT AGC ACC ATT TGA AA
	ola-miR-31-5p	ACA CTC CAG CTG GGA GGC AAG ATG TTG GC
	ola-miR-34-5p	ACA CTC CAG CTG GGT GGC AGT GTG GTT AG
	ola-miR-34-3p	ACA CTC CAG CTG GGC AAC CAC TCT CCA CA
	ola-miR-36a-3p	ACA CTC CAG CTG GGT CAC CGG GTA TAC AT
	ola-miR-67-3p	ACA CTC CAG CTG GGT CAC AAC CTG CTT GA
	ola-miR-87-3p	ACA CTC CAG CTG GGG TGA GCA AAG TTT CA
	ola-miR-92-3p	ACA CTC CAG CTG GGA ATT GCA CTT GTC CC
	ola-miR-96a-5p	ACA CTC CAG CTG GGC TTG GCA CTG GCG GA
	ola-miR-96b-5p	ACA CTC CAG CTG GGA TTT GGC ACT TGT GG
	ola-miR-96-3p	ACA CTC CAG CTG GGA TTG GCA CTT TTG GA
	ola-miR-100-5p	ACA CTC CAG CTG GGA ACC CGT AGA ACC GA
	ola-miR-124c-5p	ACA CTC CAG CTG GGC ATT CAC CGC GTG CC
	ola-miR-124-3p	ACA CTC CAG CTG GGT AAG GCA CGC GGT GA
	ola-miR-133-5p	ACA CTC CAG CTG GGA GCT GGT TGA AAC TG
	ola-miR-133-3p	ACA CTC CAG CTG GGT TGG TCC CCT TCA AT
	ola-miR-134-5p	ACA CTC CAG CTG GGT GTG ACT GGT GGA CC
	ola-miR-137-3p	ACA CTC CAG CTG GGT ATT GCT TGA GAA TA
	ola-miR-153-3p	ACA CTC CAG CTG GGT TGC ATA GTC ACA AA
	ola-miR-183-5p	ACA CTC CAG CTG GGA ATG GCA CTG GTA GA
	ola-miR-184-3p	ACA CTC CAG CTG GGT GGA CGG AGA ACT GA
	ola-miR-190-5p	ACA CTC CAG CTG GGA GAT ATG TTT GAT AT
	ola-miR-193-3p	ACA CTC CAG CTG GGT ACT GGC CTG CAA AA
	ola-miR-214-3p	ACA CTC CAG CTG GGA CAG CAG GCA CAG AC
	ola-miR-219a-3p	ACA CTC CAG CTG GGA GAA CTG TGT GTG GA
	ola-miR-219b-3p	ACA CTC CAG CTG GGA GAA TTG CGT TTG GA
	ola-miR-219c-5p	ACA CTC CAG CTG GGT GAT TGT CCA TTG GC
	ola-miR-242a-5p	ACA CTC CAG CTG GGT TGC GTA GGC GTT GT
	ola-miR-252a-5p	ACA CTC CAG CTG GGC TAA GTA CTG GTG CC
	ola-miR-252b-5p	ACA CTC CAG CTG GGA TAA GTA GTG GTG CC
	ola-miR-263-5p	ACA CTC CAG CTG GGC TTG GCA CTG GTA GA
	ola-miR-277a-3p	ACA CTC CAG CTG GGT AAA TGC ATT ATC TG
	ola-miR-279-3p	ACA CTC CAG CTG GGT GAC TAG ATC CAC AC
	ola-miR-281-5p	ACA CTC CAG CTG GGA AGG GAG CAT CCG TC
	ola-miR-281-3p	ACA CTC CAG CTG GGT GTC ATG GAG TTG CT
	ola-miR-315-5p	ACA CTC CAG CTG GGT TTT GAT TGT TGC TC
	ola-miR-375-3p	ACA CTC CAG CTG GGT TTG TTC GTT CGG CT
	ola-miR-723-5p	ACA CTC CAG CTG GGA AGA CAT CAA TTT AA
	ola-miR-745a-3p	ACA CTC CAG CTG GGA GCT GCC TGA TGA AG
	ola-miR-745b-3p	ACA CTC CAG CTG GGA GCT GCC AAA TGA AG
	ola-miR-750-3p	ACA CTC CAG CTG GGC AGA TCT AAC TCT TC
	ola-miR-981-3p	ACA CTC CAG CTG GGT TCG TTG TCG TCG AA
	ola-miR-1000-5p	ACA CTC CAG CTG GGA TAT TGT CCT GTC AC
	ola-miR-1175-5p	ACA CTC CAG CTG GGA GTG GAG AGA GTT TT
	ola-miR-1175-3p	ACA CTC CAG CTG GGT GAG ATT CAA CTC CT
	ola-miR-1260-3p	ACA CTC CAG CTG GGA TCC CAC CGC TGC CA
	ola-miR-1542-3p	ACA CTC CAG CTG GGT ATT GAT CTC CAT TG
	ola-miR-1984-5p	ACA CTC CAG CTG GGT GCC CTA TCC GTC AG
	ola-miR-1985-5p	ACA CTC CAG CTG GGT GCC ATT TTT ATC AG
	ola-miR-1989-5p	ACA CTC CAG CTG GGT CAG CTG TCA TGA TG
	ola-miR-1992-3p	ACA CTC CAG CTG GGT CAG CAG TTG TAC CA
	ola-miR-1993-3p	ACA CTC CAG CTG GGT ATT ATG CTG CTA TT
	ola-miR-1994a/b-3p	ACA CTC CAG CTG GGT GAG ACA GTG TGT CC
	ola-miR-2001-5p	ACA CTC CAG CTG GGT TGT GAC CGT TAT AA
	ola-miR-2176-5p	ACA CTC CAG CTG GGA GAA CAT TCT GAT TC
	ola-miR-2354-3p	ACA CTC CAG CTG GGT AGT AGG TCA TGT TG
	ola-miR-3134-3p	ACA CTC CAG CTG GGT GAT GGA TAA AAG AC
	ola-miR-3286-3p	ACA CTC CAG CTG GGA ACT ATT GGT CTC TC
	ola-miR-4079-5p	ACA CTC CAG CTG GGT AGC TCT AGC TGA TA
	ola-miR-4864-3p	ACA CTC CAG CTG GGA GCC AGA CCT TAT TT
	ola-miR-4966-3p	ACA CTC CAG CTG GGT GTT CAA CAT ATG TA
	ola-miR-5607-3p	ACA CTC CAG CTG GGA TTT AAT TTT CGT GC
	ola-miR-6833-5p	ACA CTC CAG CTG GGT TTC TCT CTA CAC TT
	ola-miR-7428-5p	ACA CTC CAG CTG GGT CTG ATT GGC GCT TT
	ola-miR-7620a-1-5p	ACA CTC CAG CTG GGT ATT GTA GGA CTT AT
	ola-miR-7908-1-3p	ACA CTC CAG CTG GGA GCA TCA CTA TCT CT
	Universal Primer	ACC GGT TCT CGT CCG ATC ACC GAA GT
	Stem-loop Adapter	CTC ACA GTA CGT TGG TAT CCT TGT GAT GTT CGA TGC CAT ATT GTA CTG TGA GTT TTT TTT TVN
