# Supplementary material for: Estivation-responsive microRNAs in a hypometabolic terrestrial snail
Source: PeerJ. 2019 Feb 20;7:e6515. doi: 10.7717/peerj.6515 (PMC6387573; doi:10.7717/peerj.6515)
Supplement: Table S2 — Relative abundance of 75 miRNAs in the foot muscle of O. lactea during estivation, relative to controls. MiRNA abundance was evaluated by RT-qPCR and standardized against the 5S rRNA reference gene. Data are means ± SEM, n = 3 − 4 biological replicates. Statistical analysis was performed using a Student t-test where expression levels significantly different from control (p < 0.05) are indicated by *. [file peerj-07-6515-s002.xlsx]

## Sheet: Relative Expression
	microRNA	Estivation
		Relative expression ± SEM	p-value	t-value	Defree of Freedom	Effect Size
	ola-bantam-3p	1.877 ± 0.486	0.123	-1.795	6	1.26924
	ola-let-7-5p	1.743 ± 0.313	0.083	-2.0784	6	1.46964
	ola-miR-1-3p	3.051 ± 0.812	0.071	-2.1915	6	1.54961
	ola-miR-2a-3p	2.583 ± 0.397	0.013 *	-3.5091	6	2.48128
	ola-miR-2c-3p	2.335 ± 0.274	0.011 *	-3.6508	6	2.58148
	ola-miR-7-5p	2.218 ± 0.295	0.018 *	-3.483	5	2.91354
	ola-miR-8-3p	0.850 ± 0.152	0.741	0.34957	5	0.284295
	ola-miR-9-5p	1.283 ± 0.162	0.387	-0.93302	6	0.659742
	ola-miR-12-5p	4.945 ± 0.884	0.005 *	-4.3096	6	3.04735
	ola-miR-29-3p	1.685 ± 0.308	0.128	-1.7664	6	1.24906
	ola-miR-31-5p	1.176 ± 0.266	0.583	-0.58077	6	0.410668
	ola-miR-34-5p	0.995 ± 0.120	0.974	0.033913	6	0.0239803
	ola-miR-34-3p	0.872 ± 0.014	0.217	1.4106	5	1.17362
	ola-miR-36a-3p	1.112 ± 0.304	0.753	-0.32989	6	0.233264
	ola-miR-67-3p	1.814 ± 0.320	0.088	-2.032	6	1.43687
	ola-miR-87-3p	1.803 ± 0.239	0.034 *	-2.7318	6	1.93164
	ola-miR-92-3p	1.309 ± 0.156	0.172	-1.5488	6	1.09519
	ola-miR-96a-5p	1.495 ± 0.178	0.085	-2.0643	6	1.45968
	ola-miR-96b-5p	0.664 ± 0.112	0.12	1.809	6	1.27912
	ola-miR-96-3p	1.160 ± 0.195	0.474	-0.76369	6	0.540011
	ola-miR-100-5p	0.851 ± 0.129	0.623	0.5183	6	0.366492
	ola-miR-124c-5p	1.717 ± 0.229	0.036 *	-2.6971	6	1.90717
	ola-miR-124-3p	0.697 ± 0.095	0.222	1.364	6	0.96446
	ola-miR-133-5p	1.788 ± 0.253	0.048 *	-2.4778	6	1.75206
	ola-miR-133-3p	1.828 ± 0.137	0.009 *	-3.8382	6	2.714
	ola-miR-134-5p	1.251 ± 0.199	0.264	-1.2311	6	0.870512
	ola-miR-137-3p	1.297 ± 0.254	0.368	-0.98869	5	0.826904
	ola-miR-153-3p	1.964 ± 0.067	0.005 *	-4.674	5	3.81893
	ola-miR-183-5p	2.222 ± 0.617	0.106	-1.899	6	1.34277
	ola-miR-184-3p	1.090 ± 0.077	0.633	-0.50325	6	0.355848
	ola-miR-190-5p	3.858 ± 1.026	0.038 *	-2.6542	6	1.8768
	ola-miR-193-3p	1.208 ± 0.112	0.137	-1.7156	6	1.21314
	ola-miR-214-3p	2.062 ± 0.209	0.003	-4.8295	6	3.41495
	ola-miR-219a-3p	1.528 ± 0.199	0.049 *	-2.4636	6	1.74201
	ola-miR-219b-3p	1.690 ± 0.184	0.011 *	-3.6145	6	2.55585
	ola-miR-219c-5p	1.583 ± 0.289	0.112	-1.8609	6	1.31588
	ola-miR-242a-5p	0.986 ± 0.072	0.974	0.034386	6	0.0243145
	ola-miR-252a-5p	1.154 ± 0.071	0.455	-0.79838	6	0.564541
	ola-miR-252b-5p	1.071 ± 0.350	0.857	-0.18797	6	0.132915
	ola-miR-263-5p	1.106 ± 0.456	0.826	-0.23038	6	0.162903
	ola-miR-277a-3p	1.032 ± 0.115	0.876	-0.16335	6	0.115504
	ola-miR-279-3p	1.482 ± 0.243	0.112	-1.8613	6	1.3161
	ola-miR-281-5p	2.625 ± 0.487	0.027 *	-2.8995	6	2.05025
	ola-miR-281-3p	1.783 ± 0.186	0.069	-2.2149	6	1.5662
	ola-miR-315-5p	2.752 ± 0.802	0.087	-2.0401	6	1.44259
	ola-miR-375-3p	1.168 ± 0.364	0.673	-0.4438	6	0.313811
	ola-miR-723-5p	2.924 ± 0.445	0.008 *	-3.9117	6	2.76596
	ola-miR-745a-3p	1.892 ± 0.233	0.016 *	-3.3353	6	2.3584
	ola-miR-745b-3p	2.638 ± 0.294	0.002 *	-5.1076	6	3.6116
	ola-miR-750-3p	2.056 ± 0.363	0.054	-2.3913	6	1.6909
	ola-miR-981-3p	1.457 ± 0.067	0.108	-1.9555	5	1.60545
	ola-miR-1000-5p	1.079 ± 0.048	0.404	-0.89691	6	0.634214
	ola-miR-1175-5p	1.449 ± 0.111	0.03 *	-2.9976	5	2.37757
	ola-miR-1175-3p	2.021 ± 0.181	0.022 *	-3.0561	6	2.16098
	ola-miR-1260-3p	1.373 ± 0.242	0.334	-1.0497	6	0.742275
	ola-miR-1542-3p	1.629 ± 0.235	0.038 *	-2.6555	6	1.87774
	ola-miR-1984-5p	1.399 ± 0.145	0.067	-2.3288	5	1.9458
	ola-miR-1985-5p	2.290 ± 0.411	0.031 *	-2.7957	6	1.97688
	ola-miR-1989-5p	2.565 ± 0.235	0.001 *	-5.6018	6	3.96104
	ola-miR-1992-3p	2.764 ± 0.708	0.055	-2.3787	6	1.68197
	ola-miR-1993-3p	1.621 ± 0.337	0.181	-1.5549	5	1.29985
	ola-miR-1994a/b-3p	2.365 ± 0.331	0.008 *	-3.8534	6	2.72475
	ola-miR-2001-5p	3.558 ± 0.852	0.035 *	-2.7145	6	1.91946
	ola-miR-2176-5p	1.385 ± 0.037	0.007 *	-4.4436	5	3.56912
	ola-miR-2354-3p	1.006 ± 0.079	0.945	-0.071533	6	0.0505815
	ola-miR-3134-3p	0.962 ± 0.124	0.817	0.242	6	0.171122
	ola-miR-3286-3p	1.345 ± 0.216	0.213	-1.3918	6	0.98413
	ola-miR-4079-5p	1.029 ± 0.129	0.86	-0.9513	6	0.672672
	ola-miR-4864-3p	1.597 ± 0.287	0.112	-1.86	6	1.31524
	ola-miR-4966-3p	1.636 ± 0.211	0.057	-2.3534	6	1.66409
	ola-miR-5607-3p	1.790 ± 0.353	0.071	-2.1923	6	1.55022
	ola-miR-6833-5p	1.586 ± 0.202	0.03 *	-2.836	6	2.00534
	ola-miR-7428-5p	1.478 ± 0.189	0.047 *	-2.4853	6	1.75735
	ola-miR-7620a-1-5p	1.372 ± 0.186	0.102	-1.9295	6	1.36439
	ola-miR-7908-1-3p	1.634 ± 0.239	0.076	-2.2359	5	1.87009

## Sheet: Sheet1
ola-bantam-3p		1.87652	±	0.486488
ola-let-7-5p		1.74251	±	0.312549
ola-miR-1-3p		3.0512	±	0.811681
ola-miR-2a-3p		2.58304	±	0.397465
ola-miR-2c-3p		2.33452	±	0.274476
ola-miR-7-5p		2.21792	±	0.29541
ola-miR-8-3p		0.850058	±	0.151672
ola-miR-9-5p		1.28253	±	0.162316
ola-miR-12-5p		4.94518	±	0.883672
ola-miR-29-3p		1.68515	±	0.30764
ola-miR-31-5p		1.17603	±	0.266401
ola-miR-34-5p		0.994834	±	0.120084
ola-miR-34-3p		0.872374	±	0.0140499
ola-miR-36a-3p		1.11232	±	0.303767
ola-miR-67-3p		1.81429	±	0.319635
ola-miR-87-3p		1.80327	±	0.239178
ola-miR-92-3p		1.30949	±	0.155627
ola-miR-96a-5p		1.49501	±	0.177501
ola-miR-96b-5p		0.66421	±	0.11237
ola-miR-96-3p		1.16047	±	0.194725
ola-miR-100-5p		0.851013	±	0.128943
ola-miR-124c-5p		1.71682	±	0.22883
ola-miR-124-3p		0.697376	±	0.0949399
ola-miR-133-5p		1.78811	±	0.252589
ola-miR-133-3p		1.82776	±	0.136752
ola-miR-134-5p		1.25118	±	0.19914
ola-miR-137-3p		1.29699	±	0.253691
ola-miR-153-3p		1.9645	±	0.0665697
ola-miR-183-5p		2.22203	±	0.617244
ola-miR-184-3p		1.0896	±	0.0767541
ola-miR-190-5p		3.85815	±	1.02591
ola-miR-193-3p		1.20792	±	0.112016
ola-miR-214-3p		2.06202	±	0.209331
ola-miR-219a-3p		1.52802	±	0.19922
ola-miR-219b-3p		1.68956	±	0.184154
ola-miR-219c-5p		1.58287	±	0.288564
ola-miR-242a-5p		0.986425	±	0.0720821
ola-miR-252a-5p		1.15359	±	0.0712031
ola-miR-252b-5p		1.0709	±	0.350086
ola-miR-263-5p		1.10631	±	0.455983
ola-miR-277a-3p		1.03162	±	0.115383
ola-miR-279-3p		1.48202	±	0.243437
ola-miR-281-5p		2.62454	±	0.48651
ola-miR-281-3p		1.78281	±	0.186
ola-miR-315-5p		2.75164	±	0.802469
ola-miR-375-3p		1.16782	±	0.363654
ola-miR-723-5p		2.92442	±	0.444523
ola-miR-745a-3p		1.89211	±	0.232796
ola-miR-745b-3p		2.63819	±	0.294125
ola-miR-750-3p		2.05578	±	0.363331
ola-miR-981-3p		1.45698	±	0.0671482
ola-miR-1000-5p		1.07907	±	0.0477627
ola-miR-1175-5p		1.44909	±	0.111437
ola-miR-1175-3p		2.02149	±	0.181216
ola-miR-1260-3p		1.37299	±	0.241945
ola-miR-1542-3p		1.629	±	0.235304
ola-miR-1984-5p		1.3994	±	0.144561
ola-miR-1985-5p		2.28994	±	0.411332
ola-miR-1989-5p		2.56484	±	0.235232
ola-miR-1992-3p		2.7644	±	0.70826
ola-miR-1993-3p		1.62108	±	0.33704
ola-miR-1994a/b-3p		2.36454	±	0.331229
ola-miR-2001-5p		3.5579	±	0.851992
ola-miR-2176-5p		1.38491	±	0.0369785
ola-miR-2354-3p		1.00642	±	0.079161
ola-miR-3134-3p		0.961874	±	0.124003
ola-miR-3286-3p		1.34545	±	0.215924
ola-miR-4079-5p		1.02867	±	0.129463
ola-miR-4864-3p		1.59712	±	0.287352
ola-miR-4966-3p		1.63553	±	0.210695
ola-miR-5607-3p		1.78991	±	0.352532
ola-miR-6833-5p		1.58552	±	0.202143
ola-miR-7428-5p		1.47824	±	0.188765
ola-miR-7620a-1-5p		1.37231	±	0.186433
ola-miR-7908-1-3p		1.6337	±	0.239393
