# Supplementary material for: Estivation-responsive microRNAs in a hypometabolic terrestrial snail
Source: PeerJ. 2019 Feb 20;7:e6515. doi: 10.7717/peerj.6515 (PMC6387573; doi:10.7717/peerj.6515)
Supplement: Table S3 [file peerj-07-6515-s003.xlsx]

## Sheet: RBioplot Data
Condition	ola-bantam-3p	ola-let-7-5p	ola-miR-1-3p	ola-miR-2a-3p	ola-miR-2c-3p	ola-miR-7-5p	ola-miR-8-3p	ola-miR-9-5p	ola-miR-12-5p	ola-miR-29-3p	ola-miR-31-5p	ola-miR-34-5p	ola-miR-34-3p	ola-miR-36a-3p	ola-miR-67-3p	ola-miR-87-3p	ola-miR-92-3p	ola-miR-96a-5p	ola-miR-96b-5p	ola-miR-96-3p	ola-miR-100-5p	ola-miR-124c-5p	ola-miR-124-3p	ola-miR-133-5p	ola-miR-133-3p	ola-miR-134-5p	ola-miR-137-3p	ola-miR-153-3p	ola-miR-183-5p	ola-miR-184-3p	ola-miR-190-5p	ola-miR-193-3p	ola-miR-214-3p	ola-miR-219a-3p	ola-miR-219b-3p	ola-miR-219c-5p	ola-miR-242a-5p	ola-miR-252a-5p	ola-miR-252b-5p	ola-miR-263-5p	ola-miR-277a-3p	ola-miR-279-3p	ola-miR-281-5p	ola-miR-281-3p	ola-miR-315-5p	ola-miR-375-3p	ola-miR-723-5p	ola-miR-745a-3p	ola-miR-745b-3p
Control	1	1	1	1	1	1	1	1	1	1	1	1	1	1	1	1	1	1	1	1	1	1	1	1	1	1	1	1	1	1	1	1	1	1	1	1	1	1	1	1	1	1	1	1	1	1	1	1	1
Control	1.0831	0.399086	0.0782091	0.314088	0.228296	0.425559	0.0633276	0.363877	0.222264	0.372486	0.535993	0.83098	0.956028	2.17109	0.314043	0.42124	0.610563	0.518438	0.4975	1.15772	0.401838	0.591001	0.359902	0.530976	0.458541	0.897734	0.660532	0.410984	0.581995	0.439204	0.119727	0.800995	0.731288	1.10069	0.850892	1.61367	0.211924	0.445693	0.681236	0.766901	0.485468	0.672979	0.310829	0.563732	0.106827	0.86314	0.454343	0.54433	0.516448
Control	0.881312	0.972575	0.359815	0.642106	0.959751	1.04094	0.989433	0.40687	0.758035	0.843289	0.929359	0.979051	1.30709	1.46791	0.706363	1.04458	0.955296	1.08719	0.819662	0.896634	1.50411	0.996879	0.708435	1.24084	1.04285	0.856239	1.03794	0.847158	0.926606	0.989487	0.608685	0.895543	0.801733	0.794774	0.919312	0.98602	0.225798	1.12127	0.590268	0.912713	0.687844	0.912868	1.58454	1.72721	0.789827	1.34035	0.577126	0.838476	0.876286
Control	1.01748	0.846854	0.274392	0.67046	0.7516	1.02727	0.553259	0.517815	0.807926	0.418159	0.636422	0.649527	1.21916	1.67158	0.462836	0.862241	1.1682	1.23299	0.638563	0.802127	1.75872	1.20144	0.588982	0.631759	0.738539	0.815491	0.994548	0.753883	0.44176	0.836111	0.488475	0.870639	0.844244	0.818841	1.07096	1.20615	0.460446	0.763873	1.06766	0.745823	0.967558	1.02015	0.867595	0.489284	0.602887	1.30869	0.444854	0.65925	0.883276
Estivation	1.22557	1.80898	1.71448	1.53173	1.73451	2.13796	0.776387	0.732933	3.86623	1.02558	0.949738	0.88463	1.01343	0.642548	1.10325	1.90803	1.22815	1.74356	0.576997	1.12519	1.29301	1.78262	0.495927	1.68971	1.17017	1.03658	1.99967	1.56657	0.749457	0.860522	3.27369	0.941321	1.76324	1.27748	1.70958	1.2946	0.524164	1.10509	0.666306	1.59409	0.656444	1.33214	1.37538	1.5709	1.72025	1.8778	2.60744	1.56275	2.39567
Estivation	1.1654	1.86527	1.97872	1.54731	2.01917	2.0911	2.0415	0.846209	3.45094	1.58278	1.41117	1.14314	1.31327	1.50872	0.812632	1.49676	1.40476	1.59428	0.652002	0.760696	1.08508	1.04892	0.618457	2.05223	1.47341	0.652867	1.36293	1.50147	1.95543	1.0356	2.81553	0.873411	1.24215	0.961114	1.123	1.57743	0.39863	0.856414	0.250317	1.58591	1.07062	1.75971	3.4834	2.02499	2.94341	1.24178	1.36222	1.74051	2.51367
Estivation	1.83228	0.978292	1.11659	2.4525	1.96912	1.71521	0.486177	0.883709	1.77134	0.61029	0.401307	0.737185	0.964751	2.95153	1.69275	1.63545	0.810348	0.957985	0.270359	1.63588	0.577769	1.59485	0.319598	1.1777	1.65575	1.31805	0.80291	0.54816	2.77155	0.925403	1.72621	1.21504	2.05653	1.74675	1.69983	2.88458	0.52949	0.871029	1.03035	0.603079	0.73118	1.52006	2.88645	1.90081	1.72731	0.18555	1.71309	1.52587	2.28121
Estivation	3.24885	0.955733	0.415123	1.2532	1.13985	3.12915	0.398888	0.472299	4.69975	1.21991	0.885559	0.676736	0.954487	1.91661	0.896691	0.961145	1.44646	1.44294	0.463862	0.95358	1.01385	2.07919	0.419169	1.16632	1.62249	1.45853	1.07861	1.36979	1.07936	0.735809	0.737653	1.27908	1.90207	1.6902	1.95747	1.85041	0.420115	1.00989	1.62895	0.00650296	0.781936	0.732245	2.13081	1.24273	0.486851	1.96431	1.55904	0.926781	1.45218
		Values were found to be significant outliers and were removed from all calculations
[truncated: 26 more columns]
